# Supplementary material for: fuNTRp: Identifying protein positions for variation driven functional tuning
Source: bioRxiv or medRxiv preprint supplement (doi:10.1101/578757), 2019-07-22
Supplement: Supplementary file [file media-1.pdf]

**Table S1.** Training dataset composition

|                   | Toggle | Neutral | Rheostat | SNP-Possible | Unknown | Filtered | Details                        |
|-------------------|--------|---------|----------|--------------|---------|----------|--------------------------------|
| raw               | -      | -       | -        | -            | 822     | -        |                                |
| X-residues        |        |         |          |              | 820     | 2        | undetermined amino acid X      |
| SNP-possible      | -      | -       | -        | 591          | 229     | -        |                                |
| k-means labeling  | 66     | 152     | -        | 372          | 229     | -        | k-means clustering exp. scores |
| manual refinement | 60     | 147     | -        | 372          | 229     | 12       | removed: T(6), N(6)            |
| IntModel labels   | 94     | 181     | 151      | 61           | 113     | -        | removed: T(74), N(109), R(48)  |
| manual refinement | 20     | 72      | 104      | -            | -       | 231      |                                |
| funtrpTraining    | 80     | 219     | 104      | 61           | 113     | 245      | Final funtrpTraining = 403     |

Detailed overview of the of training dataset composition for training of both random forest-based models in the *funtrp* pipeline. Show are the total numbers of instances remaining after the cluster labeling, filtering and prediction steps.

**Table S2.** Set of sequence-based features used to train *funtrp* random forest-based. models

| id | Feature               | Source       | Description                                        | Parameters              |
|----|-----------------------|--------------|----------------------------------------------------|-------------------------|
| 1  | Solvent Accessibility | PROF (*)     | predicted solvent accessibility (PACC)             | PredictProtein defaults |
| 2  | Secondary Structure   | PROF (*)     | predicted helix (pH), strand (pE) or loop (pL)     | PredictProtein defaults |
| 3  | Residue Flexibility   | PROFbval (*) | predicted residue flexibility (PROFbval)           | PredictProtein defaults |
| 4  | Protein Disorder      | MD (*)       | predicted protein disorder (MDraw)                 | PredictProtein defaults |
| 5  | Amino Acid            | -            | amino acids encoded as a vector of length 20       | NA                      |
| 6  | Residue Size          | -            | basic amino acid property (small or large)         | NA                      |
| 7  | Residue Charge        | -            | basic amino acid property (uncharged / + / -)      | NA                      |
| 8  | SNP possible          | -            | number of possible nsSNPs (all codons)             | NA                      |
| 9  | Conservation          | ConSurf (*)  | predicted conservation                             | PredictProtein defaults |
| 10 | MSA Ratio             | -            | Total fraction of residue amino acid at MSA column | NA                      |

(\*) tools are applied via the PredictProtein pipeline {Yachdav, 2014 #6}. Features were ranked by importance towards fuNTRp position type labels in Swiss-Prot using ReliefF; weights were rounded off {Kononenko, 1996 #30}. If applicable, parameters used in feature computation are specified.

**Table S4. Protein subsets for analysis**

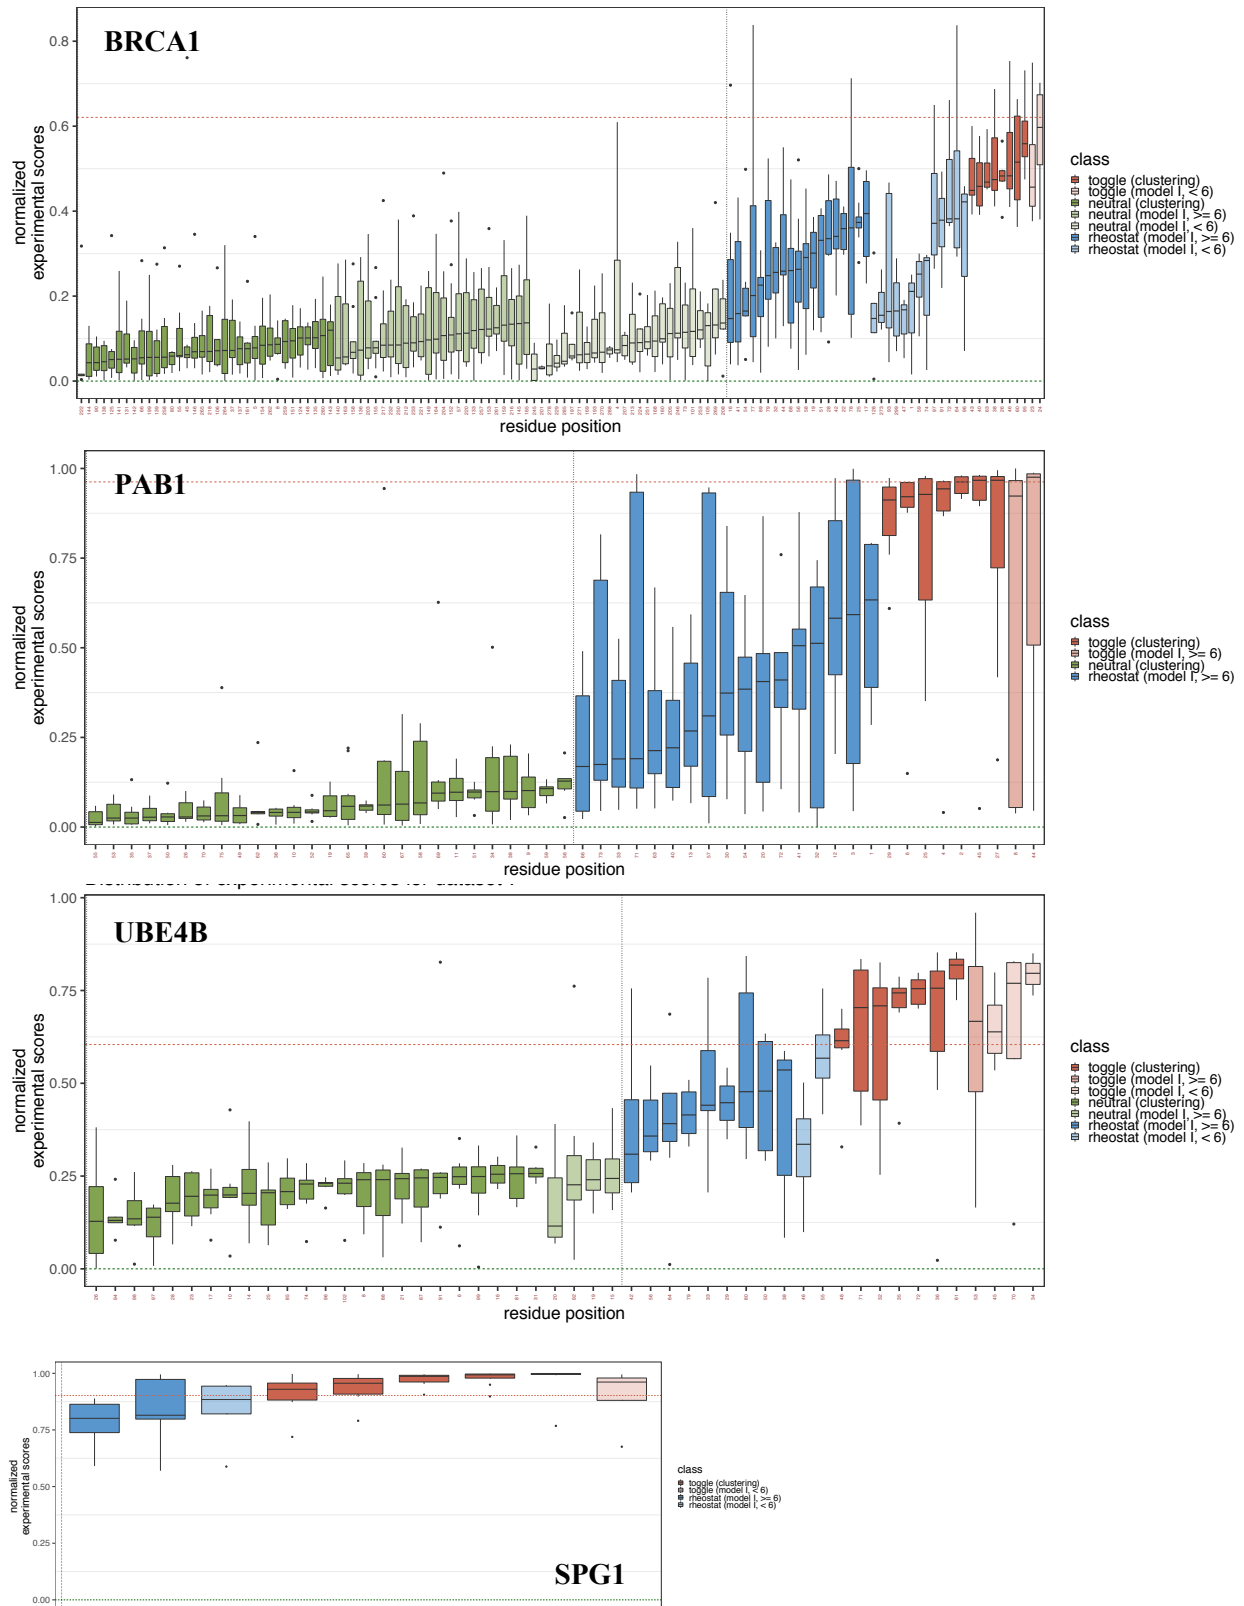

**Fig. S3. Distribution of experimental (DMS) variant effect scores for training datasets.** Measured experimental scores extracted from DMS datasets were normalized to [0,1]. Residue positions on the x-Axis are grouped by (i) position types, (ii) way of labeling and (iii) within these groupings ordered based on increasing distribution medians. The labeling types are: clustering, predicted with more than six experimental scores available and predicted with less than six experimental scores available.

| Identifier | Source              | Proteins  $\diamond$  fuNTRp | w/ E.C. annotation     | w/o E.C. annotation      |
|------------|---------------------|------------------------------|------------------------|--------------------------|
| Swiss-Prot | UniProtKB/SwissProt | 20,410 $\diamond$ 19,501     | 4.273 $\diamond$ 4.241 | 16.137 $\diamond$ 15.260 |
| TrEMBL     | UniProtKB/TrEMBL    |                              | 9.668 $\diamond$ 9.554 | 144.277 $\diamond$ 5.254 |
| EXPV       | UniProtKB/SwissProt | 1.250 $\diamond$ 1.239       | 1.250 $\diamond$ 1.239 | x                        |
| PMD        | SNPdbe              | 3.127 $\diamond$ 3.098       | x                      | x                        |

Extracted datasets used in analysis. EXPV is a subset of experimentally verified enzymes in Swiss-Prot (Mahlich, et al., 2018). Literature based annotations of effect were extracted from the PMD dataset.

**Table S5.** Confusion matrices of position type predictions for (A) *ntModel* und (B) *funtrpModel*

| (A)     |        |                       | (B)     |        |          |                       |
|---------|--------|-----------------------|---------|--------|----------|-----------------------|
| Neutral | Toggle | Observed $\downarrow$ | Neutral | Toggle | Rheostat | Observed $\downarrow$ |
| 140     | 7      | Neutral               | 199     | 4      | 16       | Neutral               |
| 9       | 51     | Toggle                | 2       | 64     | 14       | Toggle                |
|         |        |                       | 19      | 5      | 80       | Rheostat              |

Predictions for both models are based on LOO-CV results.

**Table S6.** Performance of predicting position types for a Random Forest (RF) based classifier model using evolutionary conservation alone

|   | Sensitivity | Specificity | Pos Pred Value | Neg Pred Value | Precision | Recall    | F1        | Prevalence | Detection Rate | Detection Prevalence | Balanced Accuracy |
|---|-------------|-------------|----------------|----------------|-----------|-----------|-----------|------------|----------------|----------------------|-------------------|
| N | 0.6621509   | 0.8674369   | 0.7514676      | 0.8073990      | 0.7514676 | 0.6621509 | 0.7028646 | 0.3788741  | 0.2504617      | 0.3333009            | 0.7647939         |
| R | 0.4605779   | 0.7003374   | 0.2884851      | 0.8302884      | 0.2884851 | 0.4605779 | 0.3530603 | 0.2092962  | 0.0961263      | 0.3331653            | 0.5804576         |
| T | 0.6568313   | 0.8926389   | 0.8098981      | 0.7873813      | 0.8098981 | 0.6568313 | 0.7247737 | 0.4118298  | 0.2701228      | 0.3335338            | 0.7747351         |

Shown are the averaged performances per class over 100 resample runs. For each run, 3000 residue positions from Swiss-Prot were resampled randomly (without replacement), selecting 1000 instances of each position type respectively. The same was repeated for the test set and a total of 300 residue positions. Position type labels were based on *funtrp* predictions.

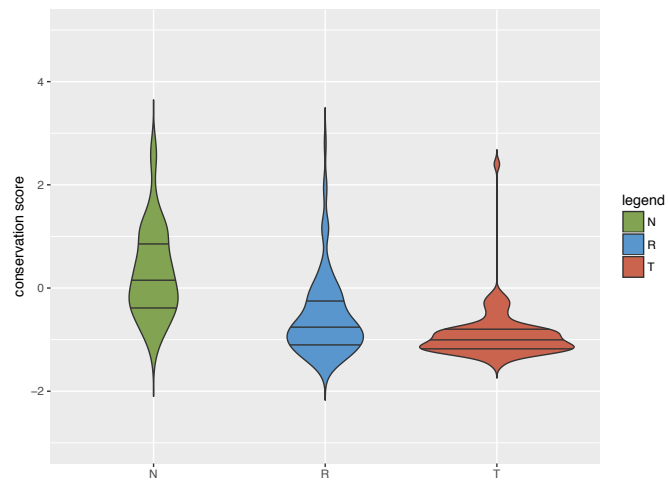

**Fig. S7. Distribution of ConSurf conservation scores for fuNTRp training dataset.** Density distributions of evolutionary conservation (ConSurf) compared between position types for the *funtro* model training dataset. ConSurf predictions scores are by default normalized such as 0 depicts the average score over the entire protein and standard deviation is |1|).

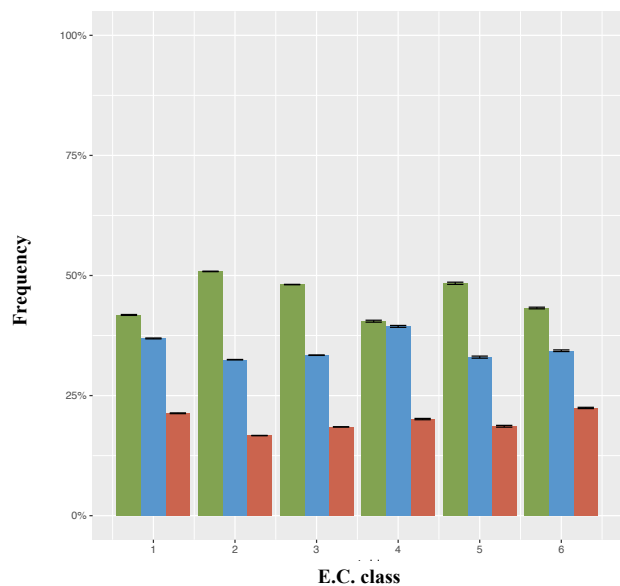

**Fig. S8. Distribution of position types for main E.C. classes in the entire Siwss-Prot dataset.** Colors are according to position type (green =Neutral, red =Rheostat, blue =Toggle). Error bars are computed based on 100 iterations of random subsampling (Methods),

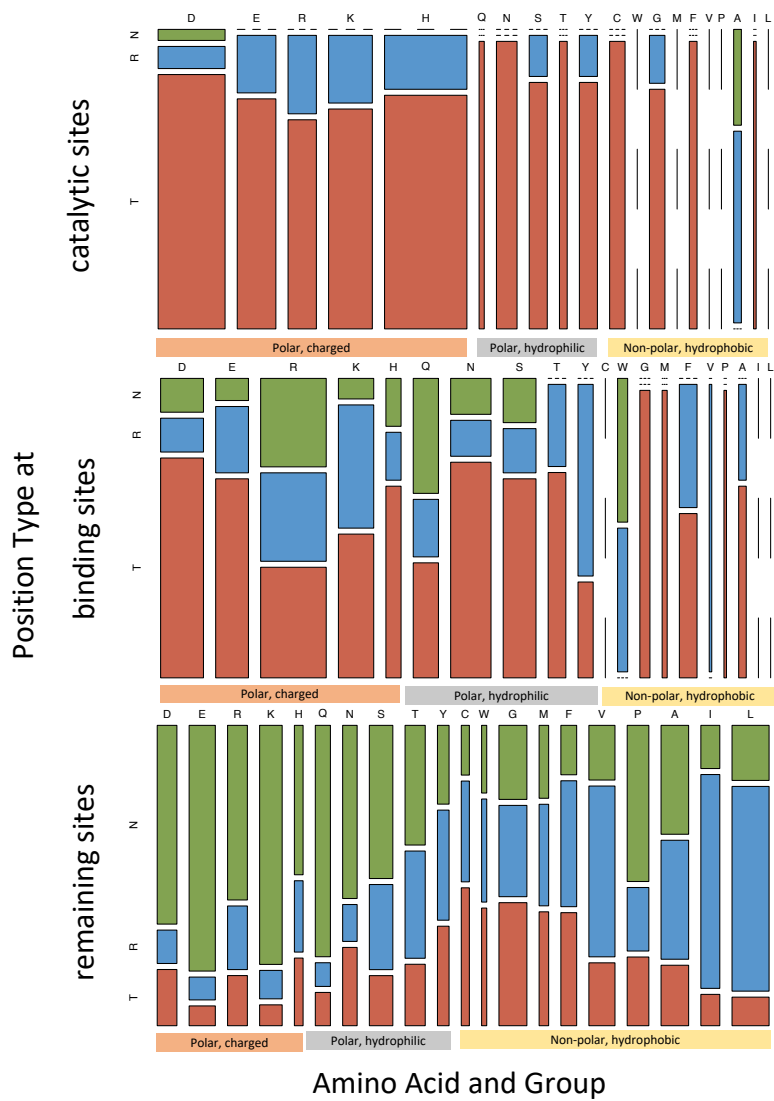

**Fig. S9. Fractions of position types per amino acid compared by site characteristic.** Comparison of fractions at catalytic sites and binding sites against the remaining residues of the respective Swiss-Prot enzymes. Colors are according to position type (green =Neutral, red =Rheostat, blue =Toggle).

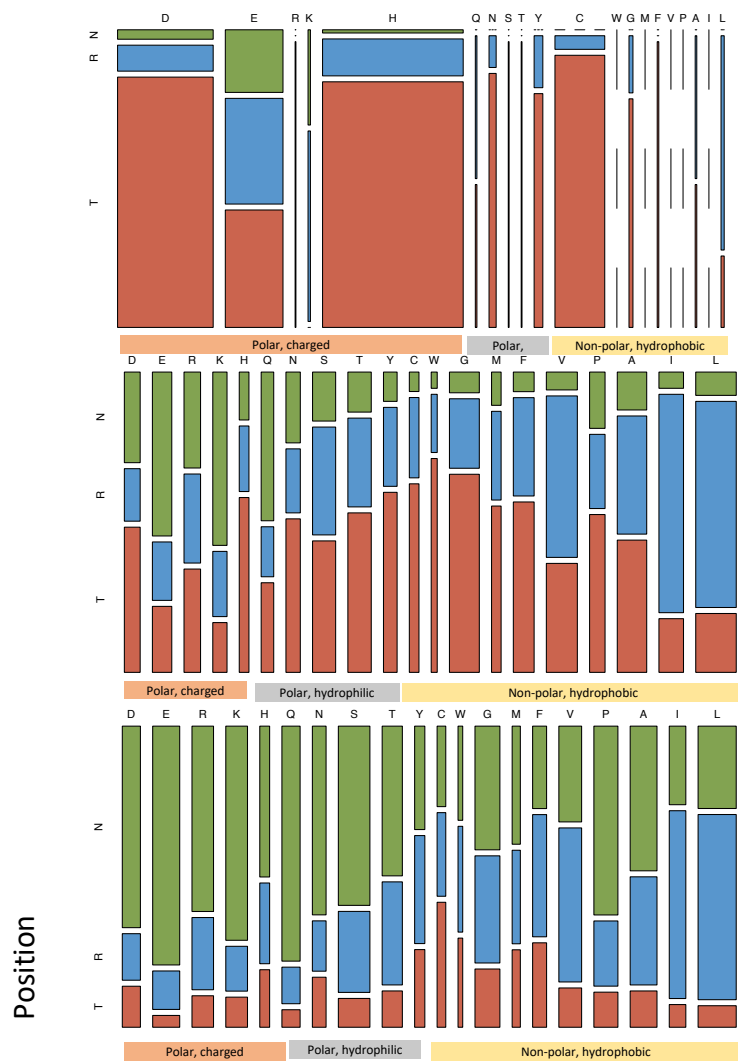

### Amino Acid and Group

**Fig. S10. Fractions of position types per amino acid for metal binding sites and spheres. Comparison of SaHLe spheres and residues annotated as metal binding sites within spheres vs remaining residues of the respective Swiss-Prot enzymes. Colors are according to position type (green =Neutral, red =Rheostat, blue =Toggle).**

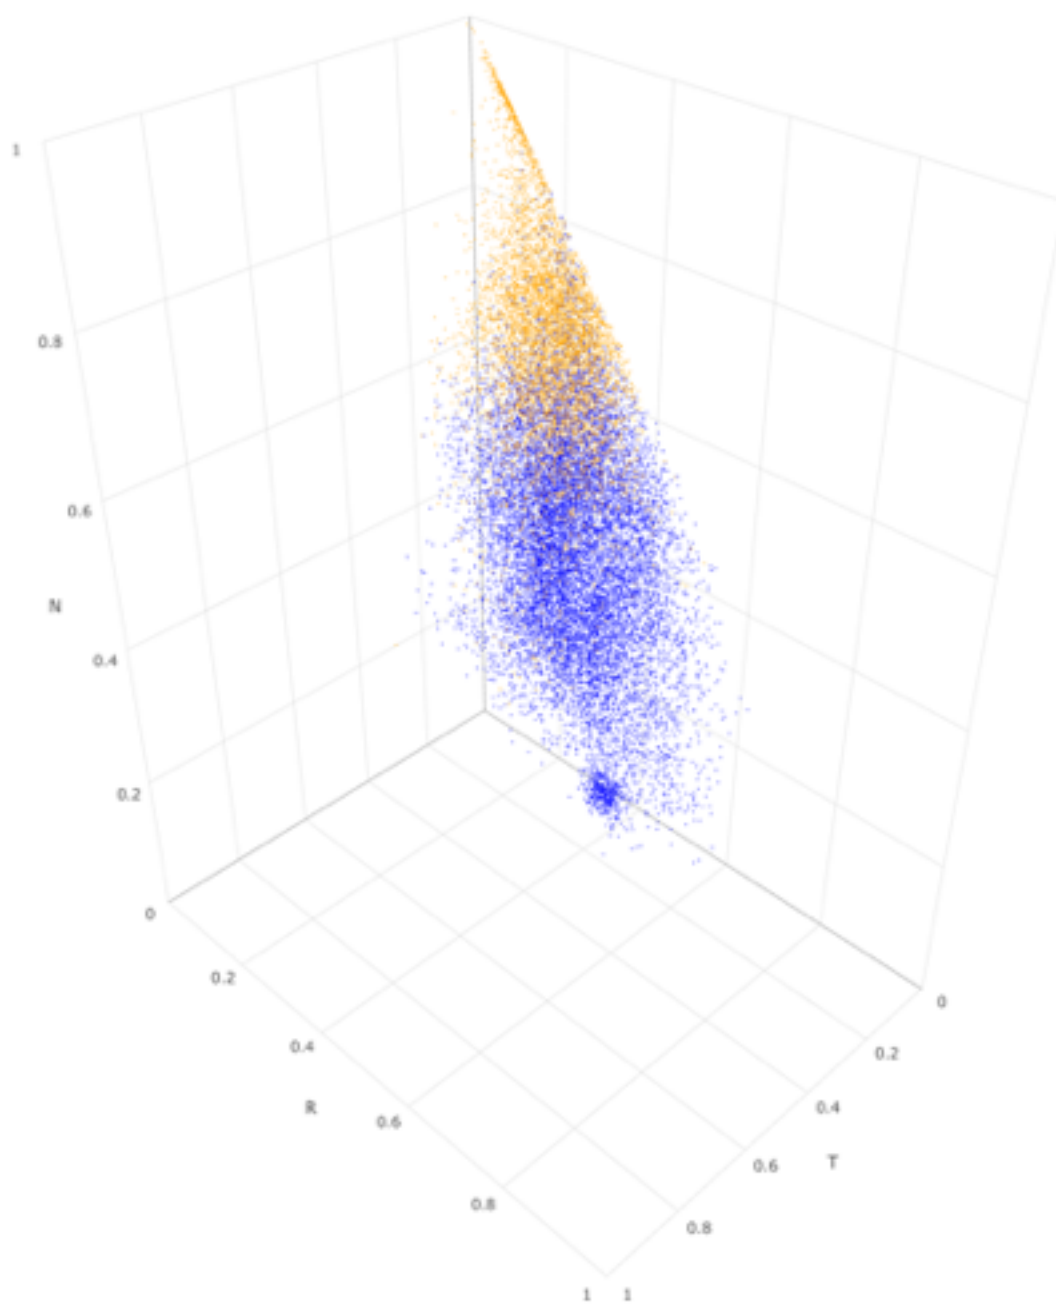

Fig. S11. *funtrp* prediction scores for disordered Proteins compared within position types. Proteins in Swiss-Prot were labeled as either ordered and disordered based on MetaDisorder predictions (Methods). Residues located in disordered proteins are highlighted in yellow, those found in ordered proteins are shown in blue.

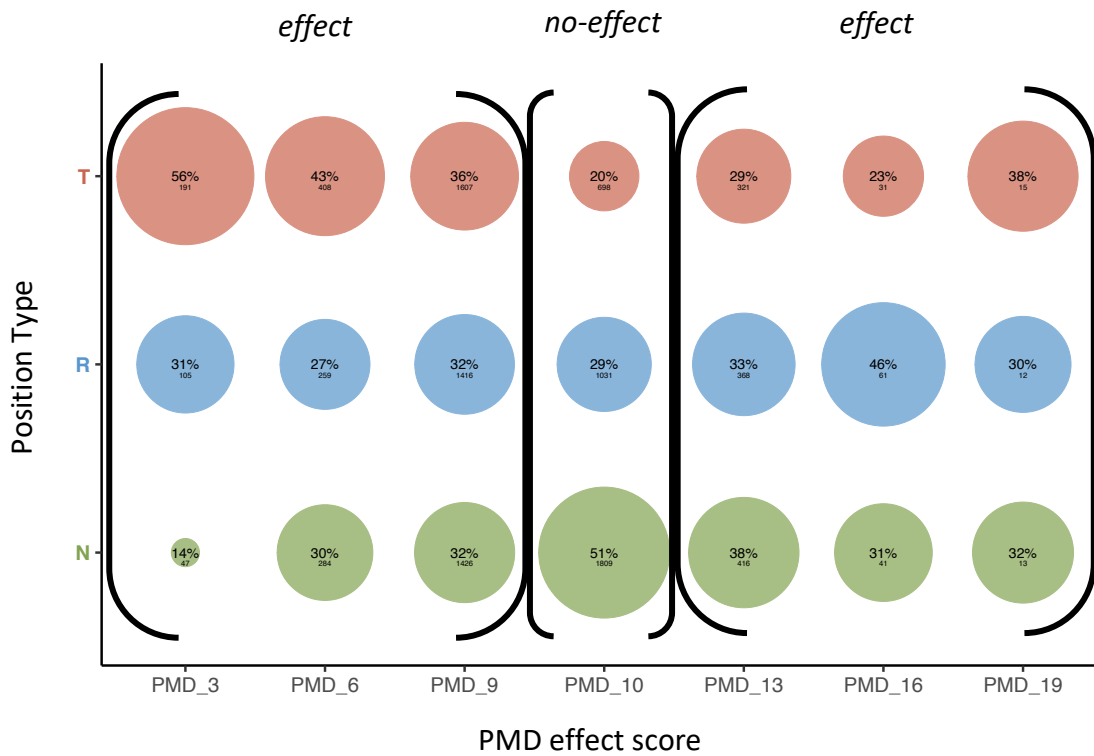

**Fig. S12** Distribution of position types for PMD disease annotations. PMD score ranges (3-9: - / 10: = / 13-19 +) were grouped into effect and no-effect. Percentages in (A) are rounded and thus do not add up to 100%. Colors are according to position type (green =Neutral, red =Rheostat, blue =Toggle).

**Table S13.** Performance of logistic regression models

| method      | Sensitivity | Specificity | Pos Pred Value | Neg Pred Value | Precision | Recall   | F1        | Balanced Accuracy | MCC       |
|-------------|-------------|-------------|----------------|----------------|-----------|----------|-----------|-------------------|-----------|
| snap        | 0.660982    | 0.607573    | 0.627475       | 0.641861       | 0.627475  | 0.660982 | 0.643786  | 0.6342776         | 0.2689453 |
| sift        | 0.554366    | 0.69174     | 0.642628       | 0.608211       | 0.642628  | 0.554366 | 0.5952343 | 0.6230528         | 0.2484609 |
| pph2        | 0.691473    | 0.590406    | 0.627991       | 0.656816       | 0.627991  | 0.691473 | 0.6581998 | 0.6409395         | 0.2833394 |
| funTRP      | 0.60711     | 0.647156    | 0.632447       | 0.622282       | 0.632447  | 0.60711  | 0.6194817 | 0.6271331         | 0.2544973 |
| snap+funTRP | 0.640329    | 0.656631    | 0.65094        | 0.646107       | 0.65094   | 0.640329 | 0.6455861 | 0.64848           | 0.2970034 |
| sift+funTRP | 0.614187    | 0.673562    | 0.652955       | 0.635821       | 0.652955  | 0.614187 | 0.6329718 | 0.6438745         | 0.2882617 |
| pph2+funTRP | 0.682427    | 0.623114    | 0.644223       | 0.662428       | 0.644223  | 0.682427 | 0.6627606 | 0.6527704         | 0.3060957 |

To compare *funtrp* with common variant effect prediction tools (SNAP, SIFT and PolyPhen-2) we converted predicted position types into approximated variant effect predictions (*Toggle* or *Rheostat* position = *effect* and *Neutral* = *no-effect*). We computed the performance for all four methods on the *no-effect* vs. *effect* groups extracted from PMD (described above). Performances are averaged over 100 iterations, each based on a subsampled dataset (without replacement and balanced regarding the class with fewer instances) from PMD.
